# Supplementary material
Source: publisher figshare collection journal article supplement (https://tandf.figshare.com/ndownloader/files/13022780)
Supplement: Supplementary file 1 [file 13022780]

Supporting Information for

**Effect of varying bases on preferential crystallization of c-methylresorcin[4]arene and calix[6]arene**

Harshita Kumari,a* Arnab Dawna and Charles L. Barnesb

aJames L. Winkle College of Pharmacy, University of Cincinnati, 231 Albert Sabin Way, Cincinnati, OH 45267-0514, USA. E-mail: kumariha@ucmail.uc.edu;

bDepartment of Chemistry, University of Missouri-Columbia, 601 S. College Avenue, Columbia, MO 65211, USA

**Materials and methods:**

Calix[6]arene (Calix6) was purchased from TCI. TEA and Pyridine were purchased from Aldrich and Acros Organics, respectively. MeOH and DMF were purchased from Fisher Scientific. DMSO-*d6* was purchased from Cambridge Isotope Laboratories.

NMR spectra were recorded in a Bruker AV 400 MHz spectrometer

**Synthesis:**

C-methylresorcin[4]arene (RsC1) is synthesized following the literature method.1

**Figure S1.** 1H NMR of RsC1 in DMSO-d6. Solvent peaks are indicated by asterisks.

1. a) Tunstad, L. M.; Tucker, J. A.; Dalcanale, E.; Weiser, J.; Bryant, J. A.; Sherman, J. C.; Helgeson, R. C.; Knobler, C. B.; Cram, D. J. *J. Org. Chem.* **1989**, *54*, 1305. b) Elidrisi, I.; Negin, S.; Bhatt, P. V.; Govender, T.; Kruger, H. G., Gokel, G. W.; Maguire, G. E. M. *Org. Biomol. Chem.* **2011**, *9*, 4498.
